# Supplementary material for: A self-assembly aptasensor based on thick-shell quantum dots for sensing of ochratoxin A
Source: Royal Society of Chemistry journal article supplement (doi:10.1039/c5nr08284f), 2016-01-01
Supplement: c5nr08284f1.pdf [file c5nr08284f1.pdf]

# Supplementary Material (ESI) for Nanoscale  
# This journal is © The Royal Society of Chemistry 2012

## A Self-assembly Aptasensor Based on Thick-shell Quantum Dots for Sensing of Ochratoxin A

Xianfeng Chu,<sup>a,†</sup> Xiaowen Dou,<sup>a,†</sup> Ruizheng Liang,<sup>b</sup> Menghua Li,<sup>a</sup> Weijun Kong,<sup>a</sup> Xihui Yang,<sup>a</sup>  
Jiaoyang Luo,<sup>a</sup> and Meihua Yang<sup>\*a,c</sup> and Ming Zhao<sup>d</sup>

<sup>a</sup> Institute of Medicinal Plant Development, Chinese Academy of Medical Sciences & Peking Union Medical College, Beijing 100193, China.

<sup>b</sup> State Key Laboratory of Chemical Resource Engineering, Beijing University of Chemical Technology, Beijing 100029, China.

<sup>d</sup> Institute of Hainan Branch of Medicinal Plant Development, Chinese Academy of Medical Sciences & Peking Union Medical College, Wanning 571533, China.

<sup>c</sup> School of Pharmacy, Jiangsu University, Zhenjiang 212013, China.

\* Corresponding author. Phone: +86-10-57833277. Fax: +86-10-62896288. E-mail:  
yangmeihua15@hotmail.com.

Tab. S1 DNA sequences used in this study

| Strand ID         | Oligonucleotides sequence (5'→3')                                          |
|-------------------|----------------------------------------------------------------------------|
| a-ssDNA1          | (A*) <sub>55</sub> -GATC <u>GGGTGTGGGTGG</u> CGTAAAGGGAGCATCGGACA          |
| phosphorothioates | a-ssDNA2 (A*) <sub>45</sub> -GATC <u>GGGTGTGGGTGG</u> CGTAAAGGGAGCATCGGACA |
| ssDNA             | a-ssDNA3 (A*) <sub>30</sub> -GATC <u>GGGTGTGGGTGG</u> CGTAAAGGGAGCATCGGACA |
|                   | c-ssDNA <u>CCACCCACACCC</u> CC-(A*) <sub>55</sub>                          |
|                   | sA-ssDNA (A*) <sub>55</sub>                                                |
| Anti-OTA          | Aptamer GATC <u>GGGTGTGGGTGG</u> CGTAAAGGGAGCATCGGACA                      |

Note: the underline stands for the complementary sequence.

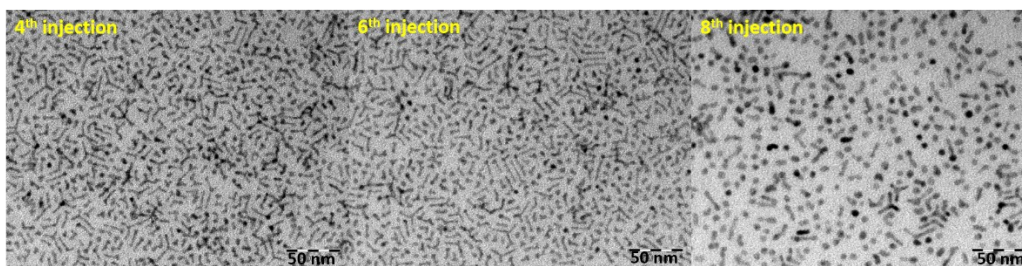

**Fig. S1** TEM images of the CdSe/CdS QDs with increased injection times (4<sup>th</sup>, 6<sup>th</sup> and 8<sup>th</sup>).

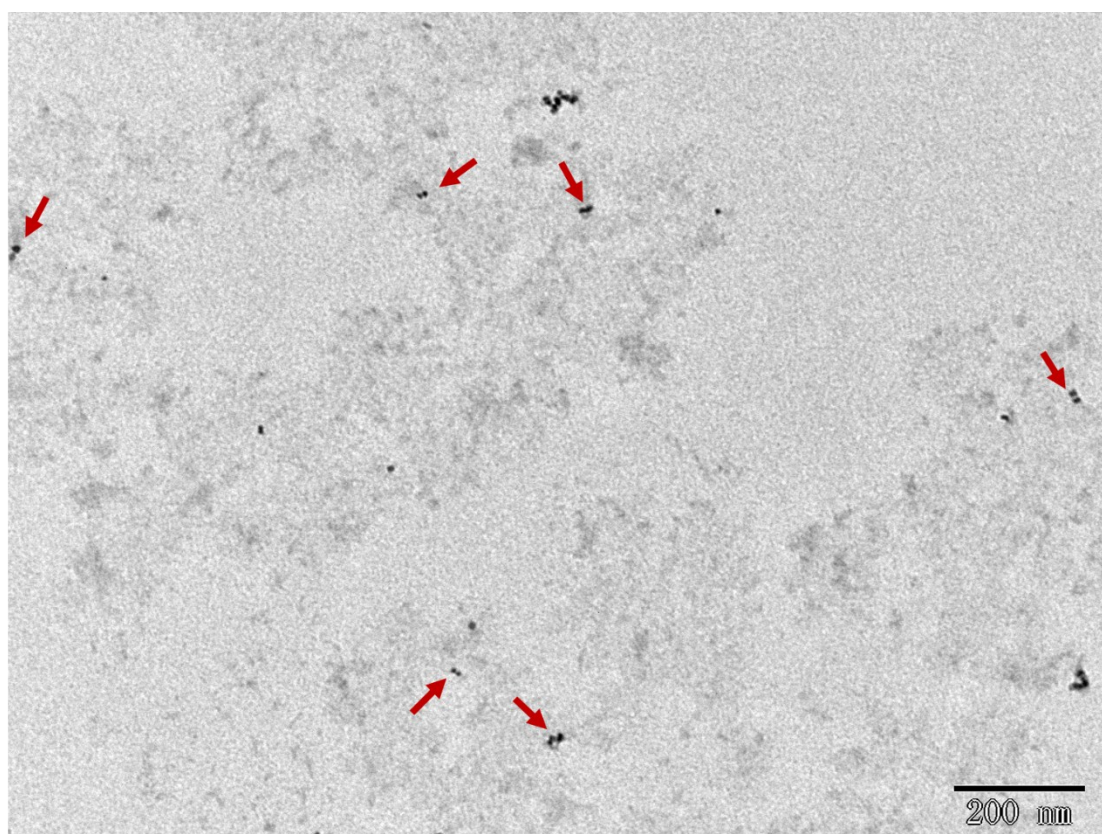

**Fig. S2** TEM image of one c-ssDNA-QD conjugate hybridization with one a-ssDNA1-QD conjugate.



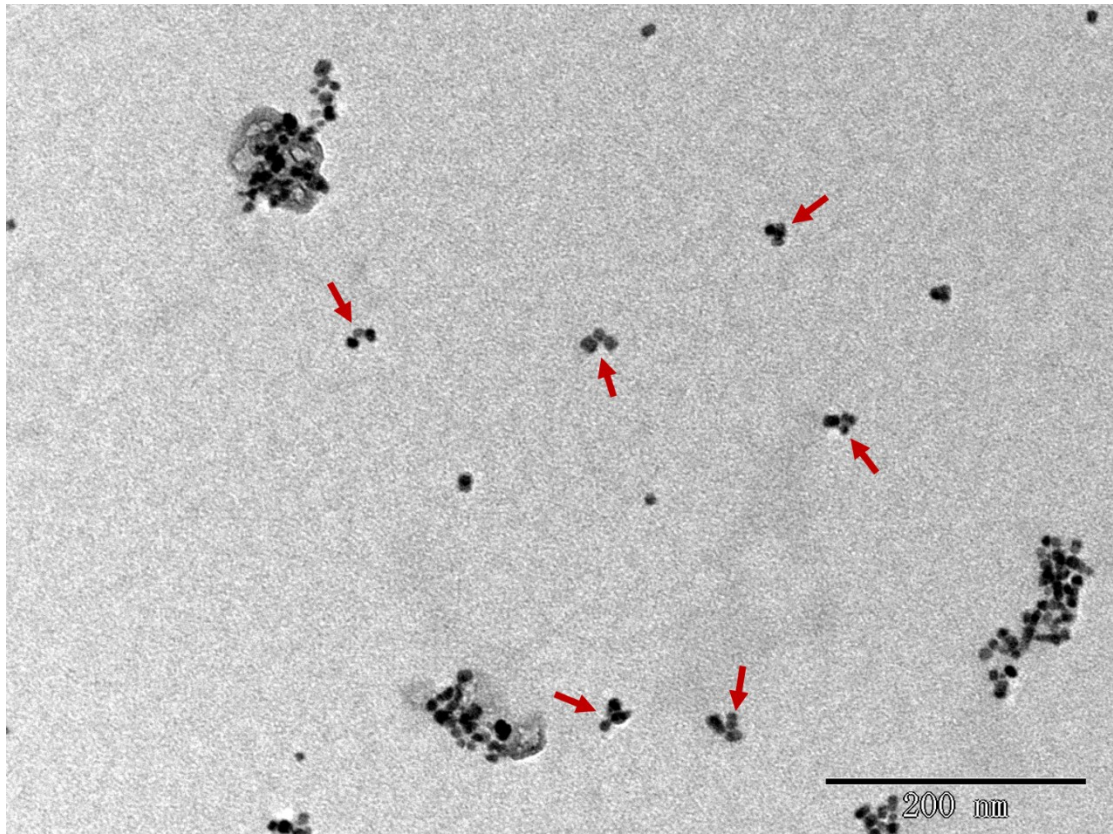

**Fig. S3** TEM image of one c-ssDNA-QD conjugate hybridization with two a-ssDNA2-QD conjugates.

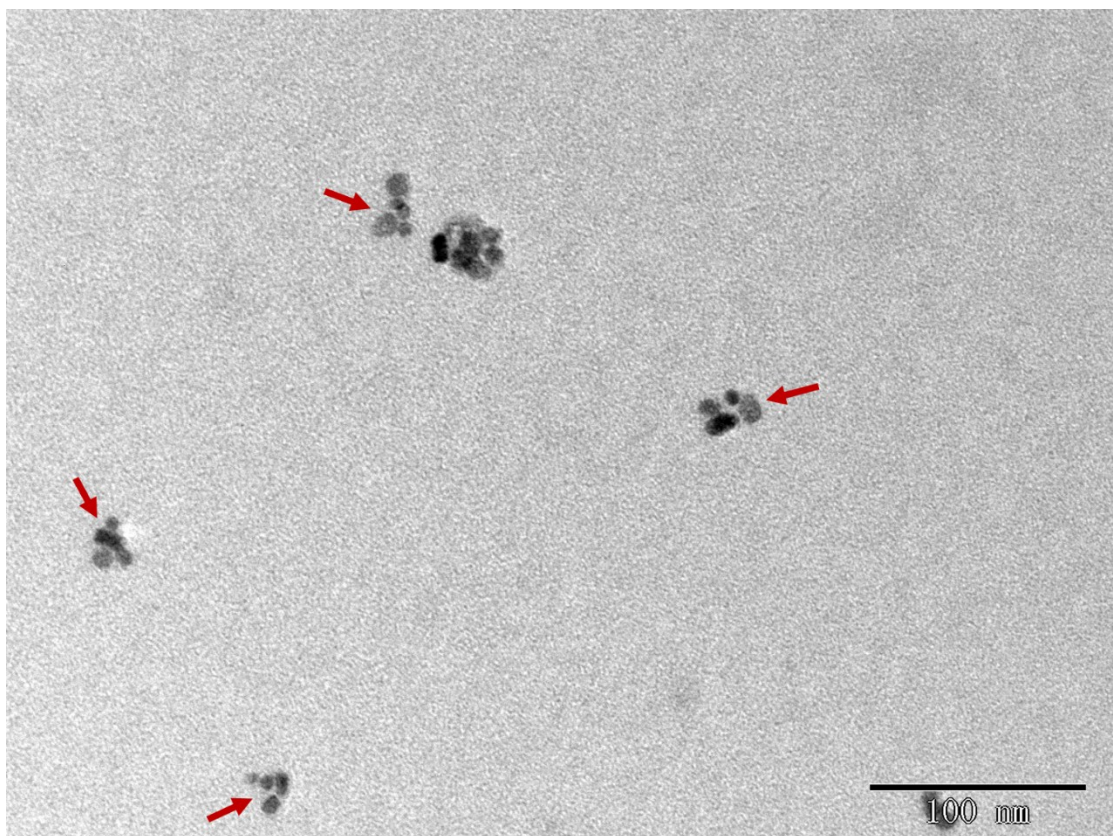

**Fig. S4** TEM image of one c-ssDNA-QD conjugate hybridization with three a-ssDNA2-QD conjugates.
